# Supplementary material
Source: MDPI journal article supplement (https://www.mdpi.com/search?q=materials-11-01530)
Supplement: s001 [file materials-11-01530-s001.pdf]

# Photovoltage Reversal in Organic Optoelectronic Devices with Insulator-Semiconductor Interfaces

Laigui Hu <sup>1,\*</sup>, Wei Jin <sup>1</sup>, Rui Feng <sup>1</sup>, Muhammad Zaheer <sup>1</sup>, Qingmiao Nie <sup>2,\*</sup>, Guoping Chen <sup>1</sup>, Zhi-Jun Qiu <sup>1</sup>, Chunxiao Cong <sup>1</sup> and Ran Liu <sup>1</sup>

<sup>1</sup> School of Information Science and Technology, Fudan University, Shanghai 200433, China; 17210720055@fudan.edu.cn (W.J.); 16210720056@fudan.edu.cn (R.F.); 17110720056@fudan.edu.cn (M.Z.); gpchenapple@fudan.edu.cn (G.C.); zjqiu@fudan.edu.cn (Z.J.Q.); cxcong@fudan.edu.cn (C.C.); rliu@fudan.edu.cn (R.L.)

<sup>2</sup> Department of Applied Physics, Zhejiang University of Technology, Hangzhou 310023, China;

\* Correspondence: laiguihu@fudan.edu.cn (L.H.); nieqingmiao@zjut.edu.cn (Q.N.)

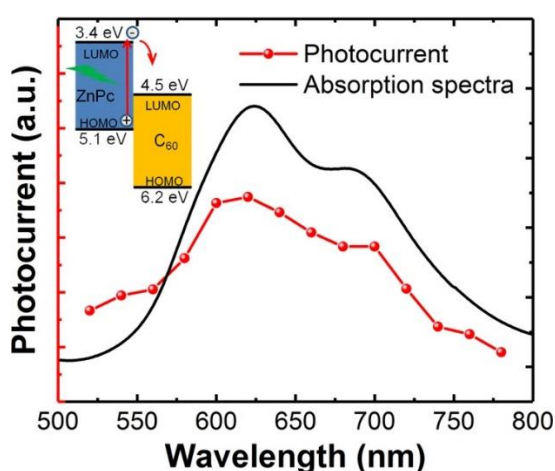

Figure S1: Photocurrent-action spectrum of the MISM device (red line). It matches well with the absorption spectrum of the ZnPc:C<sub>60</sub> blend films (black line), suggesting that charge separation process mainly occurs in the blend films. Monochromated light from a halogen lamp was utilized as the light source. Photocurrent was collected by a Keithley source meter. The inset exhibits the charge separation process in the blend film upon an illumination of green light.

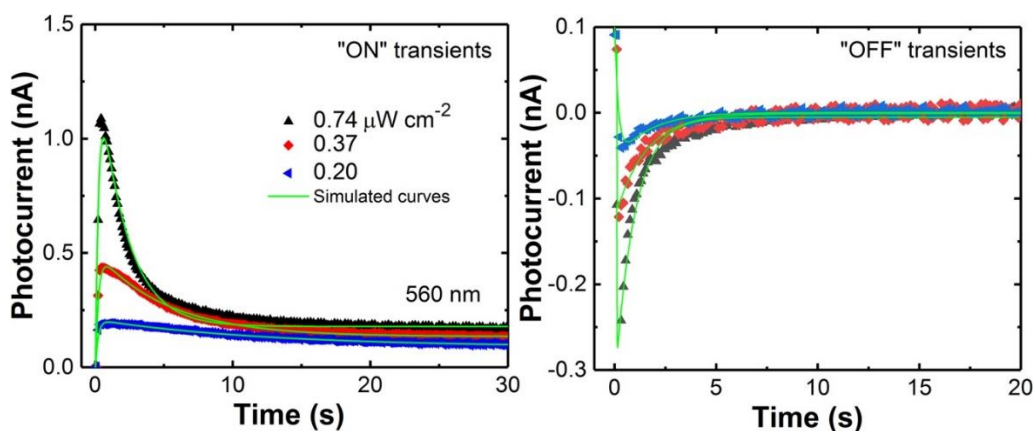

Figure S2: Photocurrent transients from a thick BDTDA film (the data was from Reference [26]) which can be regarded as a double-layer system. Both the "ON" and "OFF" transients can be simulated based on Equations (1) and (7).
